# Supplementary material
Source: publisher figshare collection journal article supplement (https://tandf.figshare.com/ndownloader/files/22720244)
Supplement: Supplementary file 1 [file 22720244]

Appendix A Experience with key medical conditions

| **Medical Conditions** | **First-hand Experience** | **Second-hand Experience** |
| --- | --- | --- |
| Diabetes | 3.1% | 33.5% |
| Serious psychiatric illness or mental health problems | 2.7% | 8.9% |
| Sleep apnoea/narcolepsy | 2.1% | 7.0% |
| Epilepsy | 1.8% | 9.7% |
| Brain or spinal injury or tumour | 1.4% | 6.0% |
| Fits/blackouts | 1.0% | 4.3% |
| Stroke | 0.6% | 15.8% |
| Sudden disabling dizziness | 0.6% | 2.7% |
| Chronic neurological condition | 0.6% | 7.6% |
| Persistent problems with limbs | 0.6% | 3.3% |
| Significant hearing loss | 0.4% | 9.3% |
| Severe learning Disability | 0.4% | 2.5% |
| Significant vision loss | 0.2% | 7.0% |
| Serious memory loss/confusion | 20.0% | 12.5% |
| Implanted cardiac defibrillator | 0.0% | 7.8% |
| Alcohol misuse/dependence | 0.0% | 10.7% |
| Drug misuse/dependence | 0.0% | 3.7% |
| No medical condition | 87.2% | 34.2% |

Appendix B Table 2 Mean risk estimates for drivers and vulnerable road users

| **Condition** | **Risk for Drivers** | | | **Risk for Vulnerable road users** | | |
| --- | --- | --- | --- | --- | --- | --- |
| **N** | **Mean** | **SD** | **N** | **Mean** | **SD** |
| Alcohol | 500 | 4.67 | 0.63 | 498 | 4.46 | 0.78 |
| Fatigue/Chronic sleep loss | 505 | 4.31 | 0.80 | 503 | 3.84 | 1.12 |
| Stroke / Brain injury | 498 | 4.13 | 0.98 | 489 | 3.54 | 1.15 |
| Epilepsy | 497 | 4.08 | 0.98 | 496 | 3.47 | 1.19 |
| Non-prescription drugs | 495 | 3.69 | 1.35 | 488 | 3.56 | 1.36 |
| Prescription medication | 493 | 3.10 | 1.21 | 486 | 2.96 | 1.22 |
| Heart conditions | 497 | 3.06 | 1.10 | 493 | 2.85 | 1.12 |
| Age 70 and over | 493 | 3.00 | 1.11 | 483 | 2.86 | 1.18 |
| Physical disabilities | 491 | 2.88 | 1.24 | 489 | 2.84 | 1.21 |
| Age - 17-24 | 486 | 2.71 | 1.23 | 480 | 2.46 | 1.29 |
| Diabetes | 487 | 2.25 | 1.09 | 493 | 2.05 | 1.08 |
| Age - 25 - 69 | 486 | 1.95 | 1.03 | 481 | 1.87 | 1.04 |
